# Supplementary material
Source: PubMed Central journal article supplement (PMC8814764)
Supplement: mmc1.pdf [file mmc1.pdf]

## Supplementary Material

### Contents

|                                                                                                                                                                                          |    |
|------------------------------------------------------------------------------------------------------------------------------------------------------------------------------------------|----|
| <b>Table S1.</b> Indicators considered for inclusion in Static Socio-Ecological Vulnerability Index which were not retained in the final model. Reference lists are not exhaustive. .... | 1  |
| <b>Figure S1.</b> Distribution of quintiles of each subdomain of the static socio-ecological COVID-19 vulnerability index (SEVI) across the South West of England .....                  | 3  |
| <b>Figure S2.</b> Distribution of quintiles of each subdomain of the static socio-ecological COVID-19 vulnerability index (SEVI) across the South East of England.....                   | 4  |
| <b>Figure S3.</b> Distribution of quintiles of each subdomain of the static socio-ecological COVID-19 vulnerability index (SEVI) across London .....                                     | 5  |
| <b>Figure S4.</b> Distribution of quintiles of each subdomain of the static socio-ecological COVID-19 vulnerability index (SEVI) across Yorkshire and The Humber.....                    | 6  |
| <b>Figure S5.</b> Distribution of quintiles of each subdomain of the static socio-ecological COVID-19 vulnerability index (SEVI) across the East Midlands of England .....               | 7  |
| <b>Figure S6.</b> Distribution of quintiles of each subdomain of the static socio-ecological COVID-19 vulnerability index (SEVI) across the West Midlands of England.....                | 8  |
| <b>Figure S7.</b> Distribution of quintiles of each subdomain of the static socio-ecological COVID-19 vulnerability index (SEVI) across the East of England. ....                        | 9  |
| <b>Figure S8.</b> Distribution of quintiles of each subdomain of the static socio-ecological COVID-19 vulnerability index (SEVI) across the North West of England .....                  | 10 |
| <b>Figure S9.</b> Distribution of quintiles of each subdomain of the static socio-ecological COVID-19 vulnerability index (SEVI) across the North East of England.....                   | 11 |
| <b>Additional References</b> .....                                                                                                                                                       | 12 |

**Table S1.** Indicators considered for inclusion in Static Socio-Ecological Vulnerability Index which were not retained in the final model. Reference lists are not exhaustive.

| Indicator                                                 | Source                                    | Geography | Modification                                                   | References    |
|-----------------------------------------------------------|-------------------------------------------|-----------|----------------------------------------------------------------|---------------|
| Population density                                        | NOMIS <sup>1</sup>                        | MSOA      |                                                                | (1–3)         |
| Higher Education progression rate                         | Office for Students (TUNDRA) <sup>3</sup> | MSOA      | Proportion population in higher education at age 18 or 19.     | (1,4–6)       |
| Air Quality Index                                         | Gov.uk <sup>2</sup>                       | LSOA      | Averaged over LSOAs within MSOA                                | (7–9)         |
| Rural Urban Classification                                | Data.gov <sup>5</sup>                     | MSOA      | Classification categories to numeric values 1-7 (1=most urban) | (2,7,8,10–13) |
| Long term illness                                         | PHE Fingertips <sup>6</sup>               | MSOA      |                                                                | (2,7,14)      |
| Cancer, % of GP patients with diagnosis on/after 1/4/2003 | PLDR <sup>7</sup>                         | LSOA      | Averaged over LSOAs within each MSOA                           | (12,15–17)    |
| Chronic Kidney Disease, % of GP patients >18              | PLDR <sup>7</sup>                         | LSOA      | Averaged over LSOAs within each MSOA                           | (1,18)        |
| Coronary Heart Disease, % of GP patients                  | PLDR <sup>7</sup>                         | LSOA      | Averaged over LSOAs within each MSOA                           | (3,14,19,20)  |
| Stroke/Transient Ischaemic Attack (TIA), % of GP patients | PLDR <sup>7</sup>                         | LSOA      | Averaged over LSOAs within each MSOA                           | (19,21,22)    |
| Atrial Fibrillation, % of GP patients                     | PLDR <sup>7</sup>                         | LSOA      | Averaged over LSOAs within each MSOA                           | (23)          |
| Spend on adult social care per person, aged 18+†          | LGInform <sup>8</sup>                     | LA        | Same value as LA                                               | (7,17)        |

|                                               |                             |    |                  |              |
|-----------------------------------------------|-----------------------------|----|------------------|--------------|
| Smoking, prevalence of current smokers in 18+ | PHE Fingertips <sup>6</sup> | LA | Same value as LA | (7,16,22,24) |
|-----------------------------------------------|-----------------------------|----|------------------|--------------|

1 <https://www.nomisweb.co.uk/>; 2 <https://www.gov.uk/government/statistics/english-indices-of-deprivation-2019>; 3 <https://www.officeforstudents.org.uk/data-and-analysis/young-participation-by-area/about-tundra/>; 4 <https://www.ons.gov.uk/peoplepopulationandcommunity/populationandmigration/populationestimates>; 5 <https://data.gov.uk/dataset/9c0e093d-d267-4eb8-90d8-54475ab4d1ff/rural-urban-classification-2011-of-middle-layer-super-output-areas-in-england-and-wales>; 6 <https://fingertips.phe.org.uk/>; 7 <https://pldr.org/>; 8 <https://lginform.local.gov.uk/>

LA Local Authority; LSOA Lower Super Output Area; MSOA Middle Super Output Area; PLDR Place-Based Longitudinal Data Resource; TIA Transient Ischaemic Attack; TUNDRA Tracking underrepresentation by area. †Indicators with greater than 5% missing data. Indices were constructed using means of non-missing variables, so that all MSOA were assigned an index value irrespective of data completeness.

### Comparative Index Construction

The index of Macharia *et al.* (2020) was constructed by combining variables associated with domains of vulnerability into two separate sub-indices (SVI and EVI) after each variable was scaled to a mean of 0 and oriented such that higher values indicated greater vulnerability. Each sub-index was compiled by summing the mean of the scaled variables in each domain, divided by the number of domains. Similarly, the SVI and EVI were subsequently combined by finding the mean of the two indices.

**Figure S1.** Distribution of quintiles of each subdomain of the static socio-ecological COVID-19 vulnerability index (SEVI) across the South West of England.

South West  
Domain 1: Socioeconomic

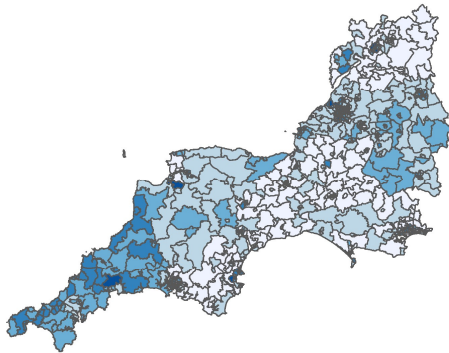

Quintile

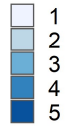

Domain 2: Ecological

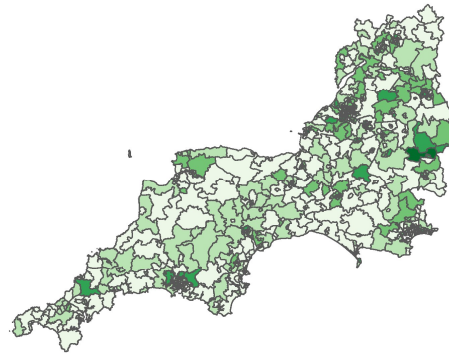

Quintile

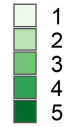

Domain 3: Healthcare

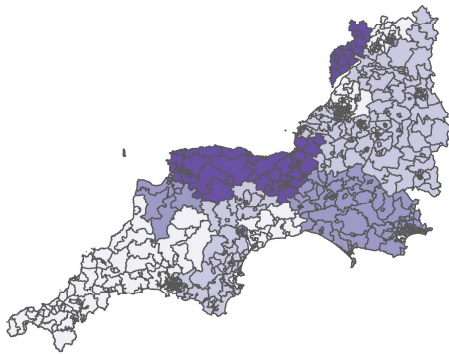

Quintile

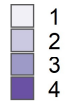

Domain 4: Epidemiological

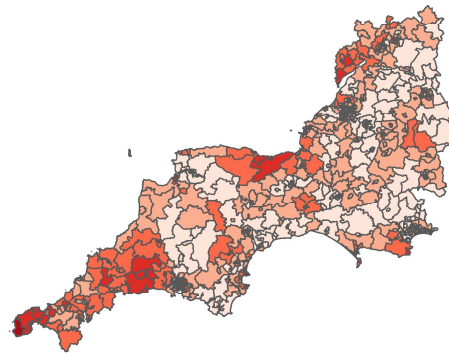

Quintile

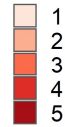

**Figure S2.** Distribution of quintiles of each subdomain of the static socio-ecological COVID-19 vulnerability index (SEVI) across the South East of England

South East

Domain 1: Socioeconomic

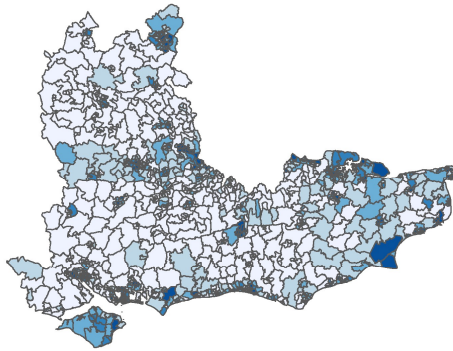

Quintile

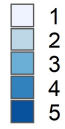

Domain 2: Ecological

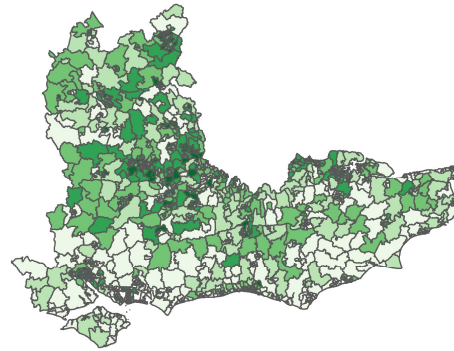

Quintile

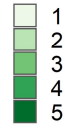

Domain 3: Healthcare

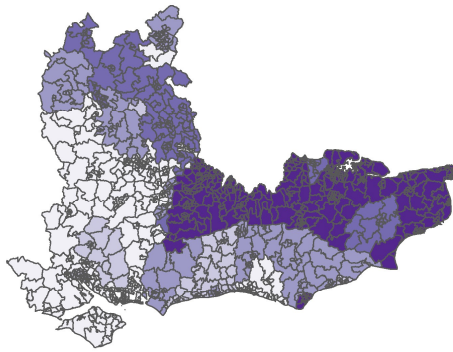

Quintile

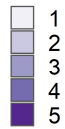

Domain 4: Epidemiological

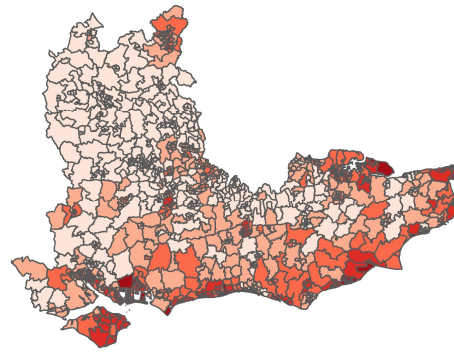

Quintile

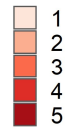



**Figure S3.** Distribution of quintiles of each subdomain of the static socio-ecological COVID-19 vulnerability index (SEVI) across London.

London

Domain 1: Socioeconomic

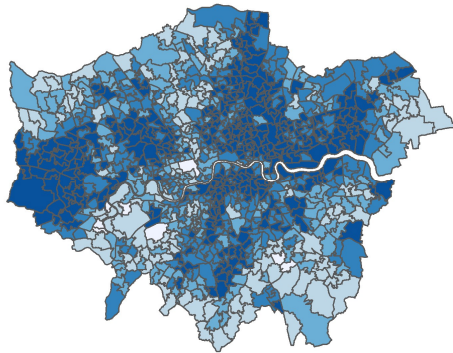

Quintile



Domain 2: Ecological

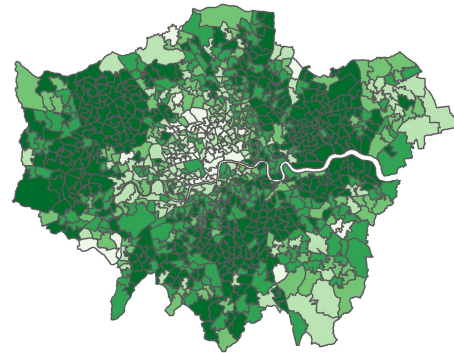

Quintile



Domain 3: Healthcare

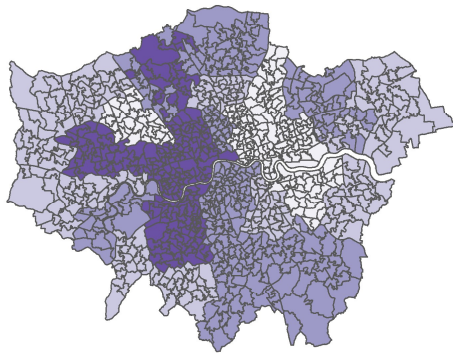

Quintile

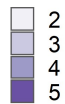

Domain 4: Epidemiological

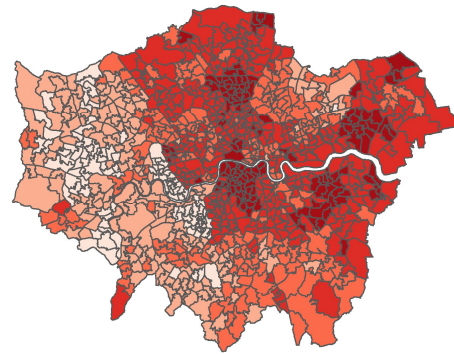

Quintile

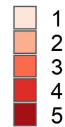

**Figure S4.** Distribution of quintiles of each subdomain of the static socio-ecological COVID-19 vulnerability index (SEVI) across Yorkshire and The Humber.

Yorkshire and The Humber  
Domain 1: Socioeconomic

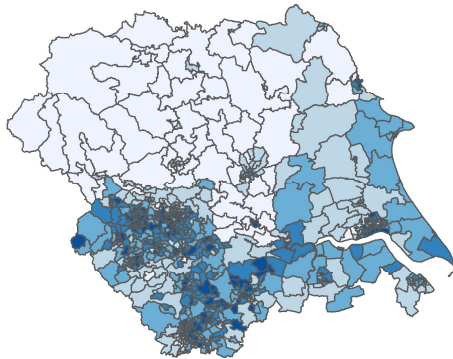

Quintile



Domain 2: Ecological

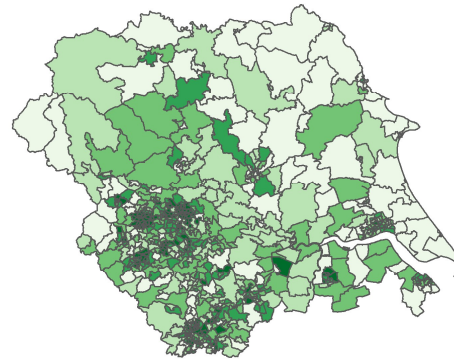

Quintile

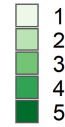

Domain 3: Healthcare

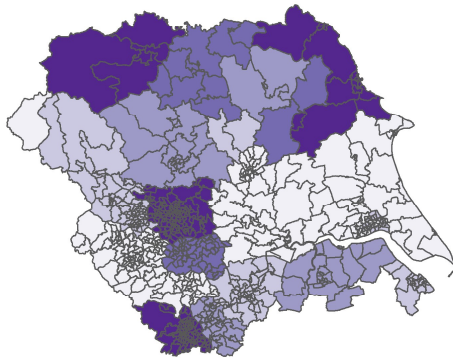

Quintile

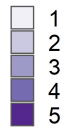

Domain 4: Epidemiological

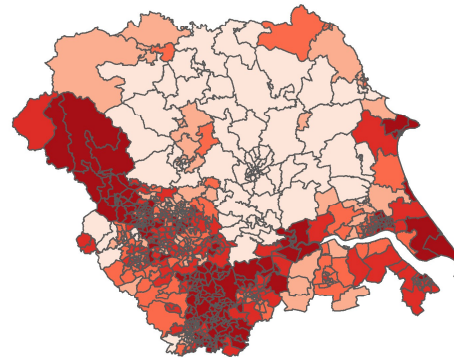

Quintile

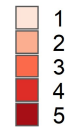

**Figure S5.** Distribution of quintiles of each subdomain of the static socio-ecological COVID-19 vulnerability index (SEVI) across the East Midlands of England

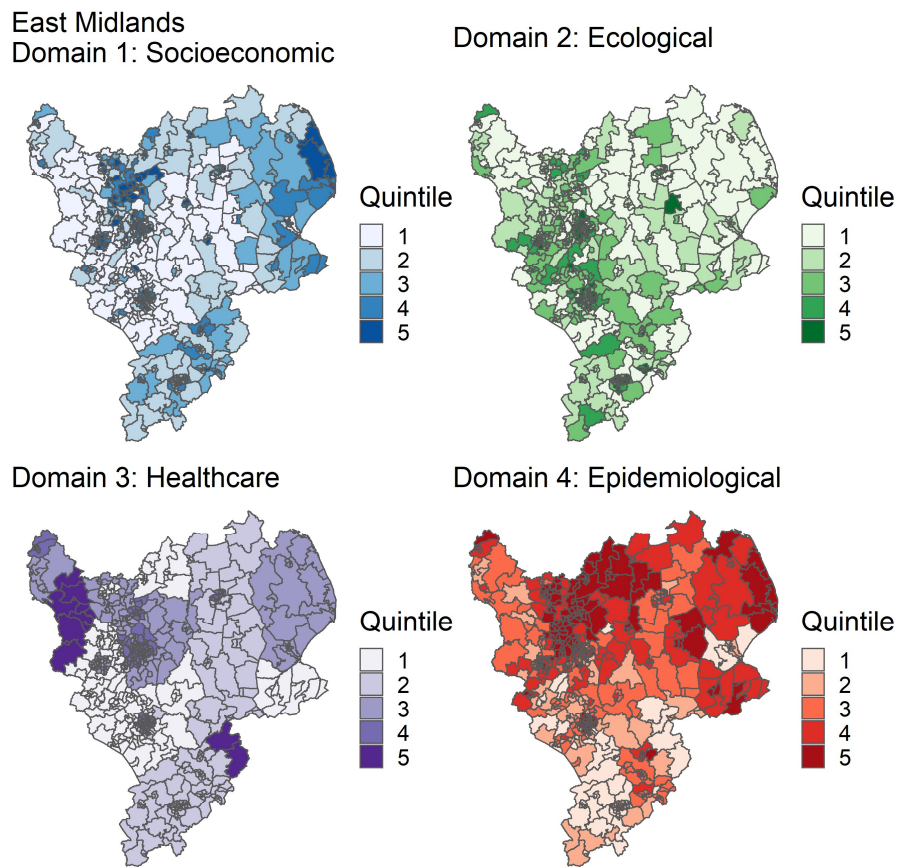

**Figure S6.** Distribution of quintiles of each subdomain of the static socio-ecological COVID-19 vulnerability index (SEVI) across the West Midlands of England.

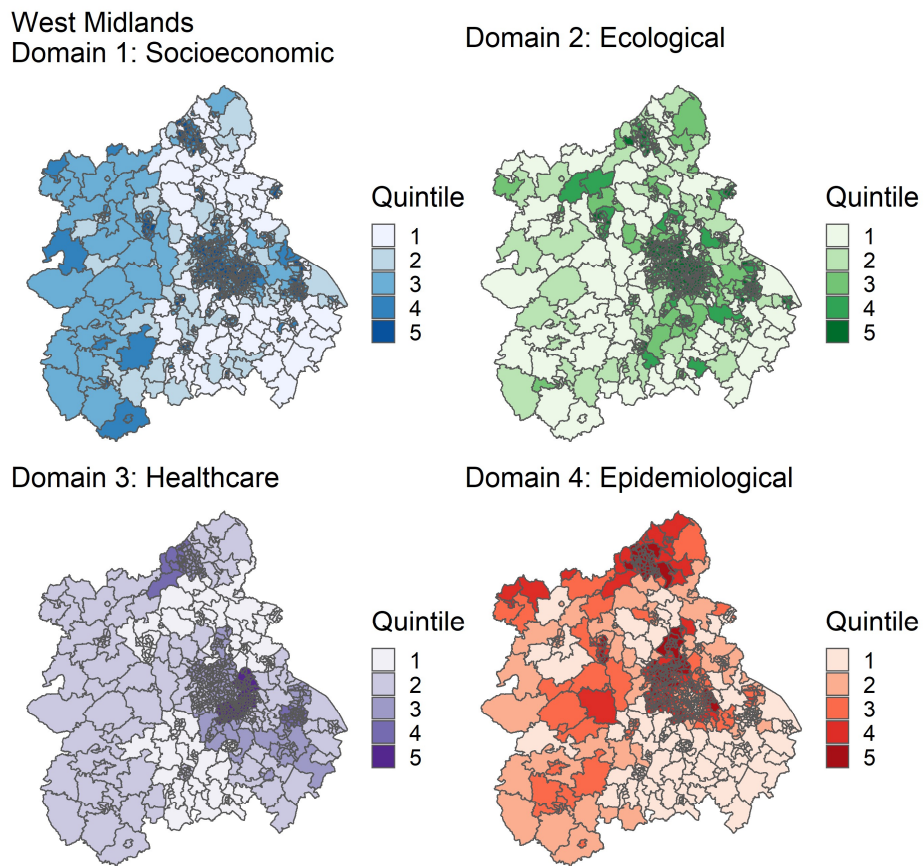

**Figure S7.** Distribution of quintiles of each subdomain of the static socio-ecological COVID-19 vulnerability index (SEVI) across the East of England.

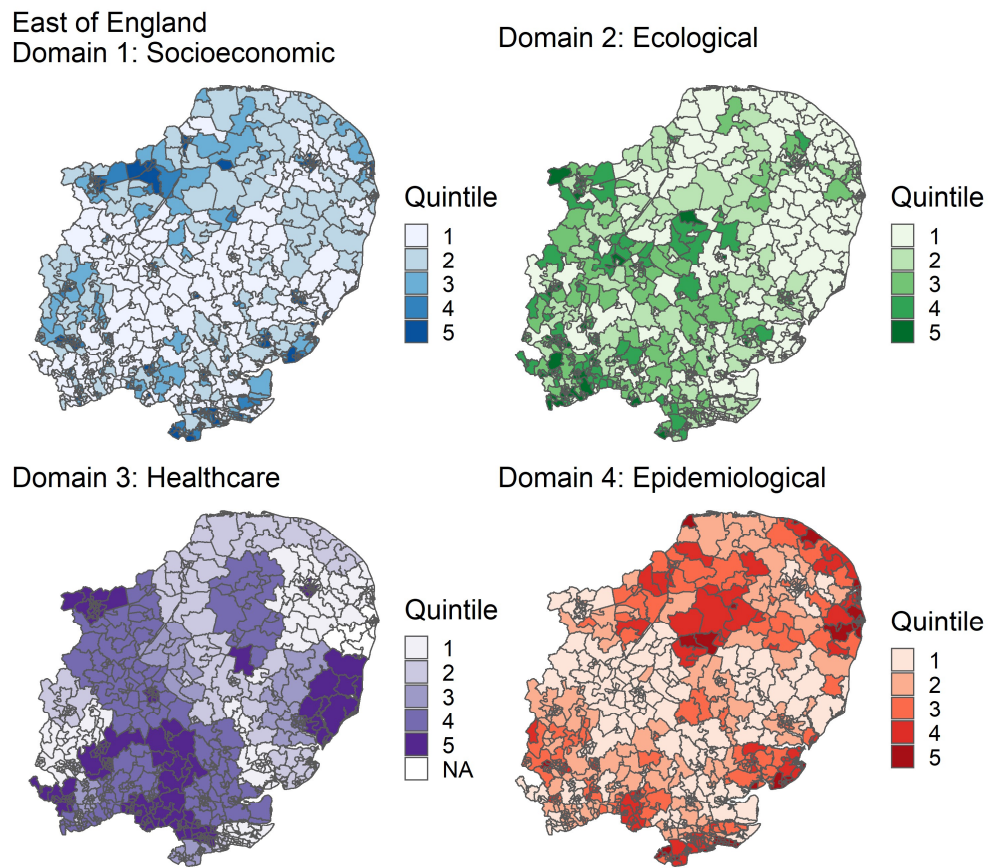



**Figure S8.** Distribution of quintiles of each subdomain of the static socio-ecological COVID-19 vulnerability index (SEVI) across the North West of England.

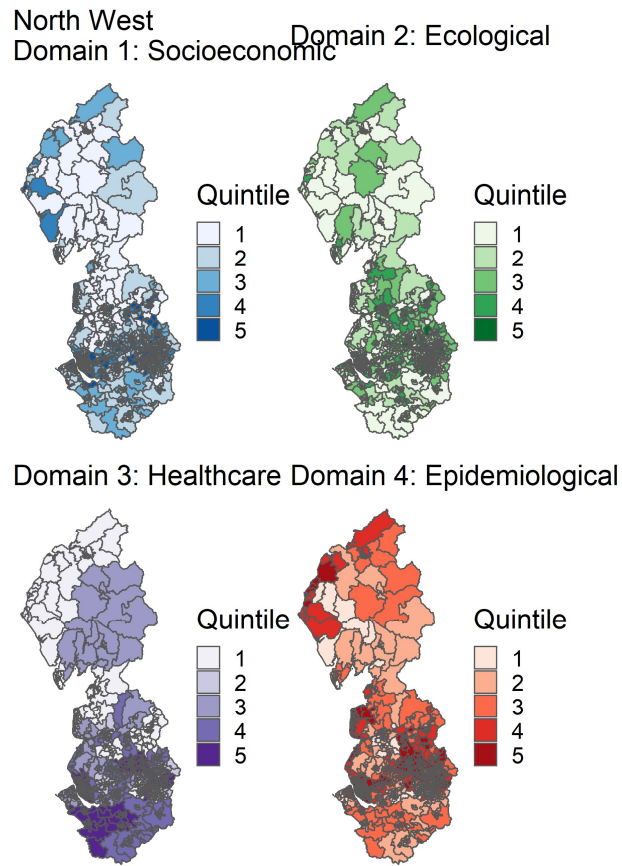

**Figure S9.** Distribution of quintiles of each subdomain of the static socio-ecological COVID-19 vulnerability index (SEVI) across the North East of England.

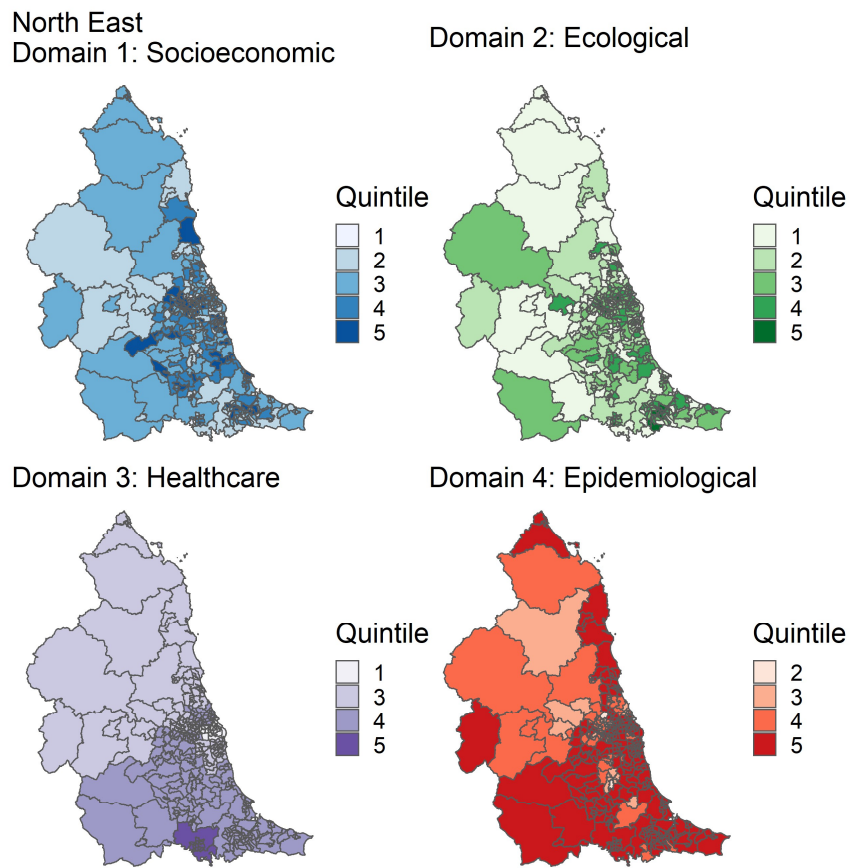



### Additional References

1. Snyder BF, Parks V. Spatial variation in socio-ecological vulnerability to Covid-19 in the contiguous United States. *Health and Place* [Internet]. 2020;66(October):102471. Available from: <https://doi.org/10.1016/j.healthplace.2020.102471>
2. Macharia PM, Joseph NK, Okiro EA. A vulnerability index for COVID-19: spatial analysis at the subnational level in Kenya. *BMJ Global Health*. 2020;5(8):e003014.
3. Public Health England. Disparities in the risk and outcomes of COVID-19. 2020;89. Available from: <https://www.gov.uk/government/publications/covid-19-review-of-disparities-in-risks-and-outcomes>
4. Laster Pirtle WN. Racial Capitalism: A Fundamental Cause of Novel Coronavirus (COVID-19) Pandemic Inequities in the United States. *Health Education and Behavior*. 2020;
5. Platt L, Warwick R. COVID-19 and Ethnic Inequalities in England and Wales\*. *Fiscal Studies*. 2020;41(2):259–89.
6. Niedzwiedz CL, O'Donnell CA, Jani BD, Demou E, Ho FK, Celis-Morales C, et al. Ethnic and socioeconomic differences in SARS-CoV2 infection in the UK Biobank cohort study. *medRxiv* [Internet]. 2020;2020.04.22.20075663. Available from: <https://www.medrxiv.org/content/10.1101/2020.04.22.20075663v1.full.pdf+html>
7. Kiaghadi A, Rifai HS, Liaw W. Assessing COVID-19 risk, vulnerability and infection prevalence in communities. *PLoS ONE* [Internet]. 2020;15(10 October):1–21. Available from: <http://dx.doi.org/10.1371/journal.pone.0241166>
8. Sarkar A, Chouhan P. COVID-19: District level vulnerability assessment in India. *Clinical Epidemiology and Global Health* [Internet]. 2021;9(June 2020):204–15. Available from: <https://doi.org/10.1016/j.cegh.2020.08.017>
9. van Barneveld K, Quinlan M, Kriesler P, Junor A, Baum F, Chowdhury A, et al. The COVID-19 pandemic: Lessons on building more equal and sustainable societies. *Economic and Labour Relations Review*. 2020;
10. Acharya R, Porwal A. A vulnerability index for the management of and response to the COVID-19 epidemic in India: an ecological study. *The Lancet Global Health* [Internet]. 2020;8(9):e1142–51. Available from: [http://dx.doi.org/10.1016/S2214-109X\(20\)30300-4](http://dx.doi.org/10.1016/S2214-109X(20)30300-4)
11. Nicodemo C, Barzin S, Cavalli N, Lasserson D, Moscone F, Redding S, et al. Measuring geographical disparities in England at the time of COVID-19: results using a composite indicator of population vulnerability. *BMJ open*. 2020;10(9):e039749.
12. Plümper T, Neumayer E. The pandemic predominantly hits poor neighbourhoods? SARS-CoV-2 infections and COVID-19 fatalities in German districts. *European journal of public health*. 2020;30(6):1176–80.
13. Caul S. Deaths involving COVID-19 by local area and socioeconomic deprivation. Office for National Statistics [Internet]. 2020;(May):1–23. Available from: <https://www.ons.gov.uk/peoplepopulationandcommunity/birthsdeathsandmarriages/deaths/bulletins/deathsinvolvingcovid19bylocalareasanddeprivation/deathsoccurringbetween1marchand17april>
14. Richards-Belle A, Orzechowska I, Gould DW, Thomas K, Doidge JC, Mouncey PR, et al. COVID-19 in critical care: epidemiology of the first epidemic wave across England, Wales and Northern Ireland. *Intensive Care Medicine*. 2020;46(11):2035–47.
15. Chen JT, Krieger N. Revealing the unequal burden of COVID-19 by income, race/ethnicity, and household crowding: US county versus zip code analyses. *Journal of Public Health Management and Practice*. 2021;27(1):S46–56.

16. Williamson EJ, Walker AJ, Bhaskaran K, Bacon S, Bates C, Morton CE, et al. Factors associated with COVID-19-related death using OpenSAFELY. *Nature* [Internet]. 2020;584(7821):430–6. Available from: <http://dx.doi.org/10.1038/s41586-020-2521-4>
17. Clouston SAP, Natale G, Link BG. Socioeconomic inequalities in the spread of coronavirus-19 in the United States: A examination of the emergence of social inequalities. *Social Science and Medicine* [Internet]. 2021;268(November 2020):113554. Available from: <https://doi.org/10.1016/j.socscimed.2020.113554>
18. Office for National Statistics. Coronavirus and the social impacts on Great Britain : 7 May 2020. 2020.
19. Tian W, Jiang W, Yao J, Nicholson CJ, Li RH, Sigurslid HH, et al. Predictors of mortality in hospitalized COVID-19 patients: A systematic review and meta-analysis. *Journal of Medical Virology*. 2020;(May):1–9.
20. Hewitt J, Carter B, Vilches-Moraga A, Quinn TJ, Braude P, Verduri A, et al. The effect of frailty on survival in patients with COVID-19 (COPE): a multicentre, European, observational cohort study. *The Lancet Public Health*. 2020;5(8):e444–51.
21. Azarpazhooh MR, Morovatdar N, Avan A, Phan TG, Divani AA, Yassi N, et al. COVID-19 pandemic and burden of non-communicable diseases: An ecological study on data of 185 countries. *Journal of Stroke and Cerebrovascular Diseases*. 2020;29(9):1–9.
22. Vandoros S. Excess mortality during the Covid-19 pandemic: Early evidence from England and Wales. *Social Science and Medicine* [Internet]. 2020;258(June):113101. Available from: <https://doi.org/10.1016/j.socscimed.2020.113101>
23. Gao P, Wu W, Tian R, Yan X, Qian H, Guo F, et al. Association between tachyarrhythmia and mortality in a cohort of critically ill patients with coronavirus disease 2019 (COVID-19). *Annals of Translational Medicine*. 2021;9(10):883–883.
24. Vahabi N, Salehi M, Duarte JD, Mollalo A, Michailidis G. County-level longitudinal clustering of COVID-19 mortality to incidence ratio in the United States. *Scientific Reports* [Internet]. 2021;11(1):1–22. Available from: <https://doi.org/10.1038/s41598-021-82384-0>
